# Supplementary material for: Chloride Channel Family in the Euhalophyte Suaeda altissima (L.) Pall: Cloning of Novel Members SaCLCa2 and SaCLCc2, General Characterization of the Family
Source: MDPI journal article supplement (doi:10.3390/ijms24020941), 2023-01-04
Supplement: s1 [file s1]

## Supplementary materials

(a)

|                |     |                                                                                        |     |
|----------------|-----|----------------------------------------------------------------------------------------|-----|
| <i>SaCLCa2</i> | 1   | MEASMQSPLSENNSSNAIDESARLNEGANTQNTPEVAANGEPDLESNFLHQPLLKRNRRLSASHLAMVGAKVSHIESLDYEINEN  | 86  |
| <i>SfCLCa2</i> | 1   | MEASAESPLSENNSSNAIDESTRFNEGANTQNTMEAAANGEPDLESNFLQPLLKRNRRLSASHLAMVGAKVSHIESLDYEINEN   | 86  |
| <i>SaCLCa2</i> | 87  | DLFKQDWRSRSKAQVLQYVFLKWKLAFLVGLLTGLIATAINLAIEIAGYKLLLVSGYVLEKRYIMGLITLTGANFLLTSSLLV    | 172 |
| <i>SfCLCa2</i> | 87  | DLFKQDWRSRSKAQVLQYVFLKWKLAFLVGLLTGLIATAINLAIEIAGYKLLLVSGYVLEKRYMMGLITLTGANFLLTSSLLV    | 172 |
| <i>SaCLCa2</i> | 173 | VFFAPTAAGPGIPEIKAYLNGIDTPNMYGAPTLLVKIFGSIQAVSAGLDLGEKGPLVHIGACIASLLGGGGTDKHRVKRWRYRIMN | 258 |
| <i>SfCLCa2</i> | 173 | VFFAPTAAGPGIPEIKAYLNGIDTPNMYGASTLLVKIFGSIQAVSAGLDLGEKGPLVHIGACVASLLGGGGTDKHRVRWRWYRIMN | 258 |
| <i>SaCLCa2</i> | 259 | NDRDRRDLITCGSSAGVCAAFRSPVGGVLFALLEEVATWWSALLWRTFFSTAVVVVVLRAFIEYCSSGKCGLFNGGGLIMFDVSNV | 344 |
| <i>SfCLCa2</i> | 259 | NDRDRRDLITCGSSAGVCAAFRSPVGGVLFALLEEVATWWSALLWRTFFSTAVVVVVLRAFIEYCSSGKCGLFNGGGLIMFDVSNV | 344 |
| <i>SaCLCa2</i> | 345 | TVSYRLMDIIPIALIGLIGGVLGSLNYTLHKVLRLYSLINERGLAKVLLSLTVSIFTSVCLYGLPFLVGCTKCDPSLTECSTTG   | 430 |
| <i>SfCLCa2</i> | 345 | TVSYRLMDIIPIALIGLIGGALGSLNYTLHKVLRLYSLINERGLAKILLSLTVSVFTSVCLYGLPFLVGCTKCDPSLTECSTTG   | 430 |
| <i>SaCLCa2</i> | 431 | RTGNYKRFCNDGYYNDLASLLFSTNDDAVRNIFSTNTPGEFHPLSLVIYFILYCIQLGLFTFGIAVPSGLFLPIILMGSAYGRLLG | 516 |
| <i>SfCLCa2</i> | 431 | RTGNYKRFCNDGYYNDLASLLFSTNDDAVRNIFSTNTPGEFHPLSLVIYFILYCIQLGLFTFGIAVPSGLFLPIILMGSAYGRLLG | 516 |
| <i>SaCLCa2</i> | 517 | IAMGSYTKIDRGLFAVLGAASLMAGSMRMTVSLGVIFLELTNNLLLPVTMLVLLIAKSVGGDFNLSIYEILELKGLPFLDANPE   | 602 |
| <i>SfCLCa2</i> | 517 | IAMGSYTKIDRGLFAVLGAASLMAGSMRMTVSLGVIFLELTNNLLLPVTMLVLLIAKSVGGDFNLSIYEILELKGLPFLDANPE   | 602 |
| <i>SaCLCa2</i> | 603 | PWMRNITVGLADVKPPVVTLRGIEKVSRIVDILKNTTHNAFPVIDDNVTVPEDGTAKELHGLILRAHLVAVLKRKWFLAGSR     | 688 |
| <i>SfCLCa2</i> | 603 | PWMRNITVGLADVKPPVVTLRGIEKVSRIVDILKNTTHNAFPVIDDNVTVPEDGTAKELHGLILRAHLVAVLKRKWFLAGPR     | 688 |
| <i>SaCLCa2</i> | 689 | TEEWVREKFTWVELAERDLNFEQVAITKQEMEMYDLHPFTNKPTPTVVEDMSAAKAMVLFQVALRHLLIVPKYQGAGIYPVIG    | 774 |
| <i>SfCLCa2</i> | 689 | TEEWVREKFTWVELAERDLNFEQVAITKQEMEMYDLHPFTNKPTPTVVEDMSAAKAMVLFQVALRHLLIVPKYQGAGIYPVIG    | 774 |
| <i>SaCLCa2</i> | 775 | VLTRQDLRAHNIQSVFPHVAKSKKQK                                                             | 800 |
| <i>SfCLCa2</i> | 775 | VLTRQDLRAHNIQSVFPHVAKSKKQK                                                             | 800 |

(b)

|                |     |                                                                                         |     |
|----------------|-----|-----------------------------------------------------------------------------------------|-----|
| <i>SaCLCc2</i> | 1   | MENELFKEDWRSRTKSEIFQYIFLKWTLSLLIGLFTGVVGFNNLGVENISGFKFLQITDYVRHEKHFKGFTFYAGCNLLLAAGA    | 86  |
| <i>SfCLCc2</i> | 1   | MSMVLCLV.....TK...FLYIMLCSLMIGLIEIF.....                                                | 26  |
| <i>SaCLCc2</i> | 87  | ALCAFIAPAAAGSGIPEVKAYLNGVDAHSILAPSTLFVKIIGSILGVAAGFVVGKEGPMVHTGACLASLLGQGGSRKYHLTWKWL   | 172 |
| <i>SfCLCc2</i> | 27  | .....D.....IIGSILGVAAGFVVGKEGPMVHTGACLASLLGQGGSRKYHLTWKWL                               | 74  |
| <i>SaCLCc2</i> | 173 | YFKNDRDRRDLITCGSAAGVAAAFRAPVGGVLFALLEEVASWWSALLWRTFFTTAVVAVVLRSLIGFERHGNCGLFEGGGLIMFDV  | 258 |
| <i>SfCLCc2</i> | 75  | YFKNDRDRRDLITCGSAAGVAAAFRAPVGGVLFALLEEVASWWSALLWRTFFTTAVVAVVLRSLIGIERHGNCGLFEGGGLIMFDV  | 180 |
| <i>SaCLCc2</i> | 259 | NHATSKWSVPDLILLILGIVGGVLSFYNYLVDKVLRITYSINEGGPVFKVLLVMTISLLTSCGSYGLPWLAPOCTPCPELQDEG    | 344 |
| <i>SfCLCc2</i> | 161 | NHATSKWSAPDLMILLILGIVGGVLSFYNYLVDKVLRITYSINEGGPVFKVLLVMTISLLTSCGSYGLPWLAPOCTPCPELQDEG   | 246 |
| <i>SaCLCc2</i> | 345 | PSIGRSGNYKNFNCPAGHYNDLASLMFTTNDDAIRNLFNNSVSKDFHVSTLYTYFGAMYCLGIITYGAIAPSGLFIPIVILAGASYG | 430 |
| <i>SfCLCc2</i> | 247 | PSIGRSGNYKNFNCPAGHYNDLASLMFTTNDDAIRNLFNNSVSKDFHVSTLYTYFGATYCLGIITYGAIAPSGLFIPIVILAGASYG | 332 |
| <i>SaCLCc2</i> | 431 | RLVGTIMGPFCSLDPLFAILGAASFLGGTMRMTVSLGVILLELTNDLLMLPLVMLVLLISKSVADNFNKGVDQIVKMKGLPFME    | 516 |
| <i>SfCLCc2</i> | 333 | RLVGTIMGPFCSLDPLFAILGAASFLGGTMRMTVSLGVILLELTNDLLMLPLVMLVLLISKSVADNFNKGVDQIVKMKGLPFME    | 418 |
| <i>SaCLCc2</i> | 517 | IHAEPYMRHLAASDVITGPLVVFSSVERVGTIMHALRATGHNGFPVIDEPPFTDAPELGGIVLRSHLLVLLKAKFTQHRELMRSN   | 602 |
| <i>SfCLCc2</i> | 419 | IHAEPYMRHLAASDVITGPLVAFSSVERVGTIMHALRATGHNGFPVIDEPPFTDAPELGGIVLRSHLLVLLKAKFTQHRELMRSN   | 504 |
| <i>SaCLCc2</i> | 603 | IKRSFQAFDFAKPGSGKGPKIDDLVITDEEMDMYVDLHPITNTCPYTVVETMSLAKAAVLFRELGLRHLCVVPKTEKPPIVGILT   | 688 |
| <i>SfCLCc2</i> | 505 | IKKSFQAFDFAKPGSGKGPKIDDLVITDEEMDMYVDLHPITNTCPYTVVETMSLAKAAVLFRELGLRHLCVVPKTEKPPIVGILT   | 590 |
| <i>SaCLCc2</i> | 689 | RHDFTPHEHILGLYPHLEVHK                                                                   | 708 |
| <i>SfCLCc2</i> | 591 | RHDFTPHEHILGLYPHLKVHK                                                                   | 610 |

**Figure S1.** Alignment of the proteins from *Suaeda altissima*, SaCLCa2 (a) and SaCLCc2 (b), with their homologs from closely related species *Suaeda fruticosa*, SfCLCa2 (a) and SfCLCc2 (b), respectively. SaCLCc2, unlike to SaCLCa2, is shortened from N-terminus.





**(a)**

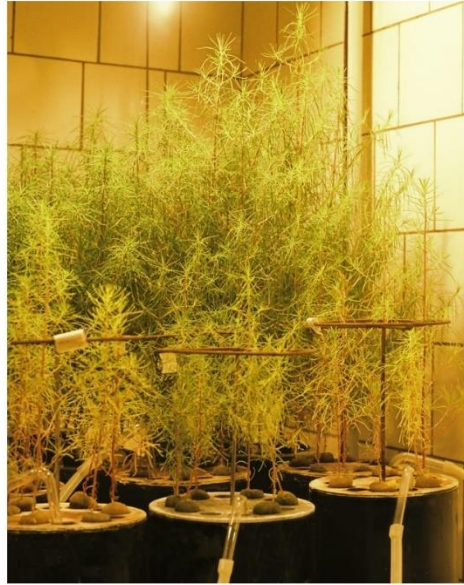

**(b)**

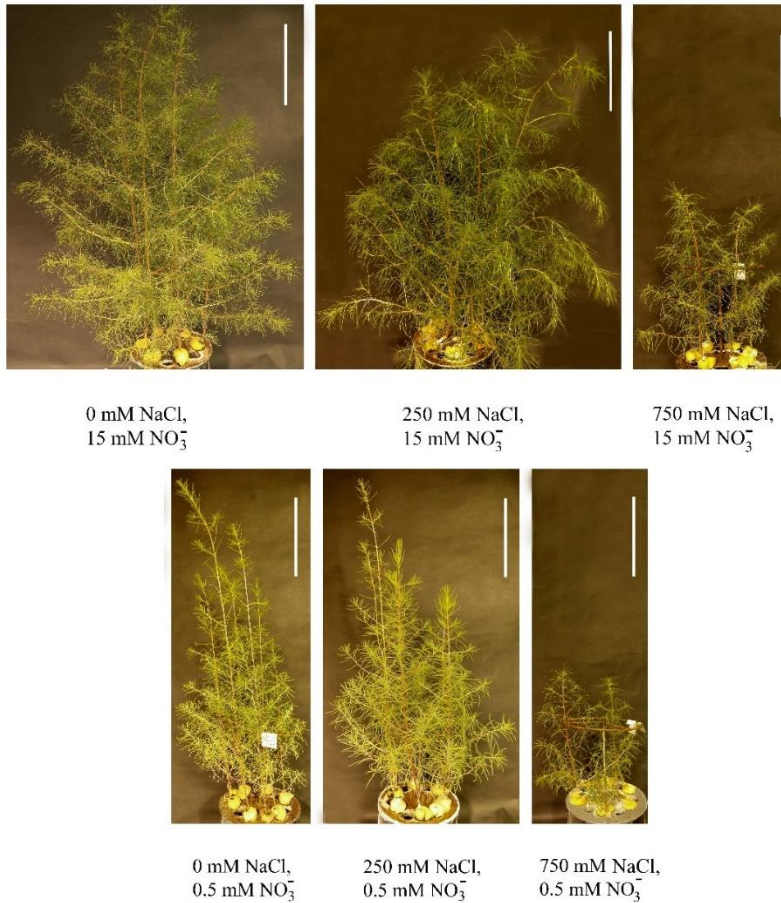

**Figure S3.** *Suaeda altissima* plants grown under different concentrations of NaCl and nitrate in the aerated nutrient medium. **(a)** General view of the plants in the growth chamber. **(b)** *S. altissima* 45-day-old plants grown under different concentrations of NaCl (0, 250, 750 mM) and nitrate (15 mM or 0.5 mM) in the nutrient medium. Scale bar represents 15 cm.

**Table S1.** Conserved amino acids motifs and residues and their positions in SaCLCa2 and SaCLCc2 sequences.

| Conserved amino acids motifs and residues    | SaCLCa2                | SaCLCc2               |
|----------------------------------------------|------------------------|-----------------------|
| Gating Glu                                   | E 225                  | E 142                 |
| Proton Glu                                   | E 292                  | E 209                 |
| (1) residues in the selectivity filter, a.a. | <b>G</b> PGIPE 181–186 | <b>G</b> SGIPE 98–103 |
| (2) GKxGPxxH, a.a.                           | GKEGPLVH 223–230       | GKEGPMVH 140–147      |
| (3) PxxGxLF, a.a.                            | PVGGVLF 282–288        | PVGGVLF 199–205       |
| CBS1, a.a.                                   | 619–677                | 535–587               |
| CBS2, a.a.                                   | 733–786                | 646–697               |

**Table S2.** The composition of the nutrient media used in the research.

| №  | 15 mM NO <sub>3</sub> <sup>-</sup> |                                                                                                                                   | №  | 0.5 mM NO <sub>3</sub> <sup>-</sup> |                                                                                                                          |
|----|------------------------------------|-----------------------------------------------------------------------------------------------------------------------------------|----|-------------------------------------|--------------------------------------------------------------------------------------------------------------------------|
| 1. | 0 mM NaCl                          | 4 mM Ca(NO <sub>3</sub> ) <sub>2</sub><br>7 mM KNO <sub>3</sub><br>1 mM KH <sub>2</sub> PO <sub>4</sub><br>2 mM MgSO <sub>4</sub> | 4. | 0 mM NaCl                           | 4 mM CaCl <sub>2</sub><br>6.5 mM KCl<br>0.5 mM KNO <sub>3</sub><br>1 mM KH <sub>2</sub> PO <sub>4</sub>                  |
| 2. | 250 mM NaCl                        | 50 µM FeSO <sub>4</sub><br>50 µM Na <sub>2</sub> EDTA<br>50 µM H <sub>3</sub> BO <sub>3</sub><br>10 µM MnCl <sub>2</sub>          | 5. | 250 mM NaCl                         | 2 mM MgSO <sub>4</sub><br>50 µM FeSO <sub>4</sub><br>50 µM Na <sub>2</sub> EDTA<br>50 µM H <sub>3</sub> BO <sub>3</sub>  |
| 3. | 750 mM NaCl                        | 1 µM ZnSO <sub>4</sub><br>0.5 µM CuSO <sub>4</sub><br>0.1 µM Na <sub>2</sub> MoO <sub>4</sub>                                     | 6. | 750 mM NaCl                         | 10 µM MnCl <sub>2</sub><br>1 µM ZnSO <sub>4</sub><br>0.5 µM CuSO <sub>4</sub><br>0.1 µM Na <sub>2</sub> MoO <sub>4</sub> |

**Table S3.** List of the primers used in the research.

| Primer name       | Nucleotide sequences (5'-3')                     | Primer designation                                                      |
|-------------------|--------------------------------------------------|-------------------------------------------------------------------------|
| SaCLCa2R          | GCCCTCAAATCTTGCCTT                               | Amplification of 3'- and 5'-ends<br><i>SaCLCa2</i> transcript sequences |
| SaCLCa2_5'RACE_R1 | GATCTTAACAAGCAATGTTGGTGCT                        |                                                                         |
| SaCLCa2_5'RACE_R2 | GCCCCTGTCAACGTAATCAGC                            |                                                                         |
| SaCLCa2_3'RACE_F1 | TCTTTGGGAGCATTGGAGC                              |                                                                         |
| SaCLCa2F          | TCCCGGAGAATTTTCATCCAC                            |                                                                         |
| pVR2_SaCLCa2_F    | AAGGATCAAAACCATCATATGGAAGCAAGTGCGGAA TCACCA      | Cloning of <i>SaCLCa2</i> into pVR2<br>vector                           |
| pVR2_SaCLCa2_R    | ACTGACTCGACCCTATCATTCTGCTTTTGGATTTTGCT           |                                                                         |
| pMB1_SaCLCa2_F    | ACACACATAAAACAAACCATGGAAGCAAGTGCGGAATCACCA       | Cloning of <i>SaCLCa2</i> into pMB1<br>vector                           |
| pMB1_SaCLCa2_R    | ATCGATACCGTCGACCTCGAGTCATTTCTGCTTTTGGATTTTGCTACA |                                                                         |
| SaCLCa2_P182S_F   | CCTACTGCTGCTGGGTCTGGTATCCCTG                     | Site-directed mutagenesis of<br><i>SaCLCa1(C544T)</i>                   |
| SaCLCa2_528_R     | AGCAAAGAAAACAACCAGCAGCGTAG                       |                                                                         |
| SaCLCc2F          | TGTCCTCCTGAACTGCGAGA                             | Amplification of 3'- and 5'-ends<br><i>SaCLCc2</i> transcript sequences |
| SaCLCc2R          | GCCTAATTCCCGAAACAACACT                           |                                                                         |
| SaCLCc2_5'RACE_R1 | GTTGTAAACATGAGTGAGGCAAGATC                       |                                                                         |
| pVR2_SaCLCc2_F    | CGAAGGATCAAAACCATCATAGAGACATTTGAATAGCTGTGAGGTGA  | Cloning of <i>SaCLCc2</i> into pVR2<br>vector                           |
| pVR2_SaCLCc2_R    | CAGTACTGACTCGACCCTAAAGGGAAACTGCTCCTCAACATTGTA    |                                                                         |
| pMB1_SaCLCc2_F    | ACACACATAAAACAAACCATGGAAAATGAACTTTTAAAGAGGATTGGA | Cloning of <i>SaCLCc2</i> into pMB1<br>vector                           |
| pMB1_SaCLCc2_R    | ATCGATACCGTCGACCTCGAGCTACTTGTGGACTTCGAGGTGC      |                                                                         |
| SaClCa1_F1        | GAGACCTTGCTGAAGCCAAGC                            | RT-qPCR                                                                 |
| SaClCa1_R1        | TGTCCCTTCACTAGTAAGGATTG                          |                                                                         |

|               |                             |                                                  |
|---------------|-----------------------------|--------------------------------------------------|
| SaCLCa2_F1    | GTCCCAGAAAGACAAGGCACG       |                                                  |
| SaClCa2_R1    | CCCATGTAAACTTCTCTCGCAC      |                                                  |
| SaClCc1_F1    | GGCAAAGTATTTCTCTGAGGAG      |                                                  |
| SaClCc1_R1    | AGATATATCCTCCAATGTGAGCC     |                                                  |
| SaClCc2_F1    | CGACCAAATTGTTAAGATGAAGG     |                                                  |
| SaClCc2_R1    | TGATCGTCCCAACTCTTTCAAC      |                                                  |
| SaClCd_F1     | GGCTTCCTGTGATAGATC          |                                                  |
| SaClCd_R1     | CACCTCTTGAATCACTAGGC        |                                                  |
| SaClCg_F1     | GGCTCCATGAGAATGACT          |                                                  |
| SaClCg_R1     | TGAAACCATCAGCCACG           |                                                  |
| SaClCf_F1     | GAAATGCTGCTGTTGCC           |                                                  |
| SaClCf_R1     | CAGAAGCAGAACAGATGTCA        |                                                  |
| SaAct7_F1     | AGATTCCGTTGCCCAG            |                                                  |
| SaAct7_R1     | ATTCCTTGCTCATACGGTCA        |                                                  |
| SaeEF1alfa_F1 | TGAGATGTGTGGCAATCC          |                                                  |
| SaeEF1alfa_R1 | GTTGCTTCTGACTCCAAGAAT       |                                                  |
| pMB1_F        | CATGGTTTGTGTTATGTGTGTTTATTC | Amplification of a linear form of<br>pMB1 vector |
| pMB1_R        | CTCGAGGTCGACGGTATCGATAAGC   |                                                  |
